# Supplementary material for: Effectiveness of screening colonoscopy in reducing the risk of death from right and left colon cancer: a large community-based study
Source: PubMed Central journal article supplement — Gut. 2016 Oct 12;67(2):291–8. doi: 10.1136/gutjnl-2016-312712 (PMC5868294; doi:10.1136/gutjnl-2016-312712), 2016-10-12
Supplement: gutjnl-2016-312712supp002.pdf [file gutjnl-2016-312712supp002.pdf]

**Online only supplementary material**

**Supplementary Table 1:** Distribution of indications by case status and derivation method

|                      | Algorithm-derived |             | Adjudicated |             |
|----------------------|-------------------|-------------|-------------|-------------|
|                      | Cases             | Controls    | Cases       | Controls    |
| <b>Colonoscopy</b>   |                   |             |             |             |
| No tests             | 661 (37.6)        | 2916 (80.2) | 696 (39.6)  | 2934 (80.7) |
| Definite screening   | 25 (1.4)          | 141 (3.9)   | 22 (1.3)    | 129 (3.6)   |
| Probable screening   | 14 (0.8)          | 20 (0.6)    | 12 (0.7)    | 17 (0.5)    |
| Surveillance         | 40 (2.3)          | 119 (3.3)   | 37 (2.1)    | 125 (3.4)   |
| Possible diagnostic  | 96 (5.5)          | 67 (1.8)    | 94 (5.3)    | 66 (1.8)    |
| Definite diagnostic  | 917 (52.1)        | 361 (9.9)   | 893 (50.8)  | 356 (9.8)   |
| Unknown              | 6 (0.4)           | 11 (0.3)    | 5 (0.3)     | 8 (0.2)     |
| <b>Sigmoidoscopy</b> |                   |             |             |             |
| No tests             | 1044 (59.4)       | 2147 (59.1) | 1060 (60.3) | 2169 (59.7) |
| Definite screening   | 334 (19)          | 997 (27.4)  | 340 (19.3)  | 1008 (27.7) |
| Probable screening   | 37 (2.1)          | 106 (2.9)   | 38 (2.2)    | 93 (2.6)    |
| Surveillance         | 4 (0.2)           | 13 (0.4)    | 3 (0.2)     | 19 (0.5)    |
| Possible diagnostic  | 72 (4.1)          | 115 (3.2)   | 78 (4.4)    | 124 (3.4)   |
| Definite diagnostic  | 259 (14.7)        | 235 (6.5)   | 232 (13.2)  | 204 (5.6)   |
| Unknown              | 9 (0.6)           | 22 (0.6)    | 8 (0.5)     | 18 (0.5)    |
